# Supplementary figures and images for: A Metabolomics Exploration of the Sexual Phase in the Marine Diatom Pseudo-nitzschia multistriata
Source: MDPI journal article supplement (doi:10.3390/md18060313), 2020-06-14

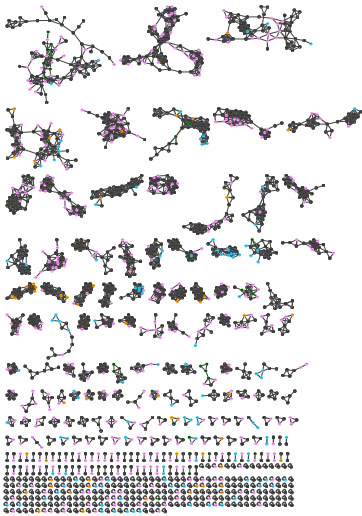

Supplement: s1 [file s1]
